# Supplementary material for: Prevalence and orthopedic management of foot and ankle deformities in Charcot–Marie–Tooth disease
Source: PubMed Central journal article supplement (PMC5811923; doi:10.1002/mus.25724), 2017-07-07
Supplement: MUS-57-255-s001.pdf [file MUS-57-255-s001.pdf]

## **Orthopaedic Survey**

**How would you mostly describe your orthopaedic practice?**

Adult foot ankle surgery only

Paediatric orthopaedics only

Both adult foot & ankle surgery and paediatric orthopaedics

Lower limb surgery

General orthopaedic surgery

General orthopaedic surgery with an interest in foot and ankle surgery

General orthopaedic surgery with an interest in paediatric orthopaedics

General orthopaedic surgery with an interest in foot and ankle surgery and paediatric orthopaedics

**How many new referrals of patients with SEVERE pes cavus do you see per year?**

<2

2-5

6-10

11-15

>15

**How many patients with Charcot-Marie-tooth (HMSN) do you see per year?**

<2

2-5

6-10

11-15

>15

**How many corrections of the hindfoot in patients with SEVERE pes cavus do you perform per year (please do not include forefoot surgery)?**

<2

2-5

6-10

11-15

>15

**Consider a 13 year old child with Charcot-Marie-tooth with a typical pes cavus who has failed conservative management. What are the procedures that you would commonly carry out?**

Gastrocnemius/Achilles lengthening

Plantar fascia release

Robert Jones Procedure

Soft tissue procedure lesser toes

Bony procedure lesser toes

Calcaneal osteotomy

First metatarsal osteotomy

Midfoot osteotomy

Midfoot fusion +/- correction

Triple arthrodesis

Tibialis posterior tendon transfer

Peroneal tendon surgery

**Consider a typical 24 year old patient with Charcot –Marie – Tooth, without any arthritic changes on radiographs and who has failed conservative treatment. What are the procedures that you would commonly carry out? (more than one response allowed)**

Gastrocnemius/Achilles lengthening

Plantar fascia release

Robert Jones Procedure

Soft tissue procedure lesser toes

Bony procedure lesser toes

Calcaneal osteotomy

First metatarsal osteotomy

Midfoot osteotomy

Midfoot fusion +/- correction

Triple arthrodesis

Tibialis posterior tendon transfer

Peroneal tendon surgery
